# Supplementary material for: Functional characterization of copper transporters zCtr1, zAtox1, zAtp7a and zAtp7b in zebrafish liver cell line ZFL
Source: Royal Society of Chemistry journal article supplement (doi:10.1039/c9mt00159j), 2019-08-13
Supplement: c9mt00159j5.pdf [file c9mt00159j5.pdf]

hATP7A Metal binding domain 1  
rATP7A  
mATP7A  
sAtp7a  
zAtp7a\*

hATP7A  
rATP7A  
mATP7A  
sAtp7a  
zAtp7a\*

hATP7A  
rATP7A  
mATP7A  
sAtp7a  
zAtp7a\*

hATP7A Metal binding domain 2  
rATP7A  
mATP7A  
sAtp7a  
zAtp7a\*

hATP7A  
rATP7A  
mATP7A  
sAtp7a  
zAtp7a\*

hATP7A ATP binding  
rATP7A  
mATP7A  
sAtp7a  
zAtp7a\*

hATP7A  
rATP7A  
mATP7A  
sAtp7a  
zAtp7a\*

hATP7A Metal binding domain 4  
rATP7A  
mATP7A  
sAtp7a  
zAtp7a\*

hATP7A  
rATP7A  
mATP7A  
sAtp7a  
zAtp7a\*

hATP7A Metal binding domain 5  
rATP7A  
mATP7A  
sAtp7a  
zAtp7a\*

hATP7A Metal binding domain 6  
rATP7A  
mATP7A  
sAtp7a  
zAtp7a\*

hATP7A Transmembrane  
rATP7A  
mATP7A  
sAtp7a  
zAtp7a\*

hATP7A Transmembrane  
rATP7A  
mATP7A  
sAtp7a  
zAtp7a\*

hATP7A Transmembrane  
rATP7A  
mATP7A  
sAtp7a  
zAtp7a\*

hATP7A Phosphorylation  
rATP7A  
mATP7A  
sAtp7a  
zAtp7a\*

hATP7A Transmembrane  
rATP7A  
mATP7A  
sAtp7a  
zAtp7a\*

hATP7A Transmembrane  
rATP7A  
mATP7A  
sAtp7a  
zAtp7a\*

hATP7A Transmembrane  
rATP7A  
mATP7A  
sAtp7a  
zAtp7a\*

hATP7A Phosphorylation  
rATP7A  
mATP7A  
sAtp7a  
zAtp7a\*

hATP7A  
rATP7A  
mATP7A  
sAtp7a  
zAtp7a\*

hATP7A ATP binding  
rATP7A  
mATP7A  
sAtp7a  
zAtp7a\*

hATP7A  
rATP7A  
mATP7A  
sAtp7a  
zAtp7a\*

hATP7A Transmembrane  
rATP7A  
mATP7A  
sAtp7a  
zAtp7a\*

hATP7A Gq12 mutation  
rATP7A  
mATP7A  
sAtp7a  
zAtp7a\*

hATP7A  
rATP7A  
mATP7A  
sAtp7a  
zAtp7a\*

hATP7A Transmembrane  
rATP7A  
mATP7A  
sAtp7a  
zAtp7a\*

hATP7A Phosphorylation  
rATP7A  
mATP7A  
sAtp7a  
zAtp7a\*
