# Supplementary material for: Functional characterization of copper transporters zCtr1, zAtox1, zAtp7a and zAtp7b in zebrafish liver cell line ZFL
Source: Royal Society of Chemistry journal article supplement (doi:10.1039/c9mt00159j), 2019-08-13
Supplement: c9mt00159j7.pdf [file c9mt00159j7.pdf]

Metal binding domain  
 2Atp7a\* ---HALSTNLKLVTLGVEGVTGSCVQVLEIIGLGLGVHIVQVSLRNNAVTYDMTQH  
 2Atp7b\* MNKLSFPSNLAIFI-----SKSPDNGPVGEE-----QLCMDCFLCHCD  
 :: : \*\* ..... : . : . : \* \* \* \* \* : : : : : : \*

2Atp7a\* RPSIADAIEDMGFESSLVAATSTPVTETKVFVKAGCSADSVQOALSTLAIKGVIEIQ  
 2Atp7b\* ---PELVCVSLPQNSKDGPIE-----YKENG-----SQEGWIPTK
 :: . : . : \* : : : : : : : . : : : . : : : : . : : : : . : : : :

2Atp7a\* ESADNQGLAVTFVPSLVEEDQELGELKCLAPDTACRPPLEKSGSTSRFSFGVAVKMRKI  
 2Atp7b\* HAFDNFG---YEPDGLKRNHLVHQ-----LPAGEG-----MVKIQV
 : \* \* \* \* : \* : . : : : : : : : : : : \* \* : : : \*

Metal binding domain  
 2Atp7a\* EGMVCLSCPTTTEGRIGRLKGVKIKVLSLEQEAADVVPYIITVDEIVHQIEVAGFKAT  
 2Atp7b\* EGMTQCSCVRSIEEQIGRLEGVIGVQVLSLDEKRALRFPNPAKVPFEDMKRRIEDMGFDAL
 : \* : : : : \* \* : : : : \* : : : : : : : : : : : : \* : : : : :

2Atp7a\* VISKPPQLKLSASEVERLLSAPKQTEELKSEPPADSTITFLQVTCGMHCNCSVVIQDNI  
 2Atp7b\* IIALQGOI-----OPLSTDMEVTLGVEGMHCGSCVKNIETEL
 : : \* : : : : : : : : : : : : : : : : : : : : : : : : :

Metal binding domain  
 2Atp7a\* SKLFAVTSVVVLENIQASIQHNPRQVSAVELQKAIKALPPGNFKAIT---ASPEFGFLQ  
 2Atp7b\* SGNLVNSVPSLEKSGVLDNRDPSSLTLLETVKGLIEEPGDFNFVGIKQMSLSLNASAT
 : \* : : : : : : : : : : : : : : : : : : : : : : : : : :

Metal binding domain  
 2Atp7a\* PLVSAVEIHIEGMTCGSCVQVIEGTLSEKRGVRSQAQVSLANHGTFFVDPLTSPPELRA  
 2Atp7b\* PTCSVT-IGIEGTCNSCQVAIEGMHMQKAGVCISKYVLQEKIVTFDSTVTCSEELRA
 : \* : : : : : : : : : : : : : : : : : : : : : : : : : :

2Atp7a\* AIEDMGDAFIPEITNSL--VPSVVKRSPS---LSVRSSLSPPVRSVAVKNEAESDAEPST  
 2Atp7b\* EIEDMGFAIMINDSEICEVSSVSQMPGLKHLPSQKRHPSKPSFSPITKENADGTGE---
 : : : : : \* \* : : : : \* \* : : : : \* : : : : : : : : : : :

Metal binding domain  
 2Atp7a\* NTILCFIQTGGMTCAVCANIERNLNKEYGHSVLVALMASAEVRYVPSVIDPLRIAE  
 2Atp7b\* RELKCFVHVTGMTCAVCASNIERNLKHEGKISVLVALMGAIEVKYDPLGLDPAIQIV
 : : : : : : : : : : : : : : : : : : : : : : : : : : :

Metal binding domain  
 2Atp7a\* LIRELGFATIHDNYDGGSDSLELVVNGMTCASCVRKTESMLNQRQILYASVALSTNKA  
 2Atp7b\* LISHLGFASVWEENSVDQVLDLSVTGMTCASCVRNIESKLRTHGIEQASVALATNKA
 : : : : : \* : : : : : : : : : : : : : : : : : : : : : :

Transmembrane  
 2Atp7a\* HIKYDPEVTGPRDIRLEINMGFTASLKKRDRPGSHLDSREIRQWRKSQISLFFCFPVV  
 2Atp7b\* HVKFDSDLVGSRDIVRLELGLGFVSLIKRNLGNWLDHQEEIRQWRKSTLSLVLVFGIPV
 : : : : : \* : : : : : \* : : : : : \* : : : : : \* : : : : : \*

Transmembrane  
 2Atp7a\* VGMIIYHTVVDHMDIYHQHNATAEDRAVYHSTFLEKQLPGLSINHLSFLFCFPVQ  
 2Atp7b\* MGLMIYMHVDSQ---HEEHGG-----SPADQNTIPGLSITINLAFFLLCTPFO
 : : : : : \* : : : : : \* : : : : : \* : : : : : \* : : : : : \*

Transmembrane  
 2Atp7a\* FICGRYFYCQAYKAVKHRTANNHVLIVLATTIAFTYSVLLVAMVBRKAVNPITFFDTP  
 2Atp7b\* FLQGRYFYIQAYSRLRGGVANHVLIVLATTIAVYVFTVLIVAMVGRKSCPITFFDTP
 : \* : : : : \* : : : : : \* : : : : : \* : : : : : \* : : : : : \*

Transmembrane  
 2Atp7a\* PHLFVFISLGRWLIQIAKSKTSEALSKLMSLQATEAVTTLNHDSVLSVEEQVDVFLVQR  
 2Atp7b\* PHLFVFIALGRWLVHVARSKTSEALAKLMSLQATDATIVSLGPNDITREEQVSDVLYQR
 : \* : : : : \* : : : : : \* : : : : : \* : : : : : \* : : : : : \*

Phosphorylation  
 2Atp7a\* GDVVKVPVGGKFFVDGKVIEGHSMADESLEKGRAMPVTKKPGSTVIAGSINONGSLLIKFA  
 2Atp7b\* GDVVFVAPGGFFVDGKVIETGSHADESLEKGRMPHYVLEKAGSCVIAGSINAHGALLVEA
 \* \* \* \* \* : \* : : : : \* : : : : : \* : : : : : \* : : : : : \* : : : : :

Transmembrane  
 2Atp7a\* THVGTDTLTSQIVKLVEEAQTSKAPIQGFADKISSVFPFIVISVLTLAMIIGFVNF  
 2Atp7b\* THVGSPTLTSQIVKLVEEAQTSKAPIQQALDLGGVFPFIVISILVTAMIIGFLDF
 : \* : : : : \* : : : : : \* : : : : : \* : : : : : \* : : : : : \*

Transmembrane  
 2Atp7a\* SLVQTFYFGYDKSISEAEVIRFAFOASITVLTACPCSLGLAFTAVMHVTGVGAQNGI  
 2Atp7b\* DVVAKNFPGYQNKISRTEVIRFAFOASITVLTACPCSLGLAFTAVMHVTGVGAQNGI
 : \* : : : : \* : : : : : \* : : : : : \* : : : : : \* : : : : : \*

Phosphorylation  
 2Atp7a\* LIKGGPELEMAHRISQVVDKTKTIPITYGAPVVQVMLEAGNLRPFRKLLAIVGTAENSS  
 2Atp7b\* LIKGGPELEMAHVGAAVMDTKTIPITNGVQVTVLVLDNRARLPKRVTLVAVGTAEAASS
 \* \* \* \* \* : \* : : : : \* : : : : : \* : : : : : \* : : : : : \* : : : : :

2Atp7a\* EHPLGAAITKYCQELGTSELGCTDFQAVPGCGICRLVSNTEPLL---KRKEDSSEEN  
 2Atp7b\* EHPLGNVAKHCEELGAETLGFCHDFQAVPGCGISCKVSSVEDLLQNSPKTQETKASAV
 \* \* \* \* \* : : : : : \* \* \* \* \* : : : : : \* \* \* \* \* : : : : : \* \* \* \* \* : : : : :

2Atp7a\* QHNVLIQISDARAHSTHEPLIMDPOPLVTVOTASVTYLVIGNRNMRRNALQVRAVDEKA  
 2Atp7b\* KQTPLLVTLQG---VTTDESSLVADTSGS--DSPSVYLVIGNRNMRNGLVETADVNDNA
 : : : : : : : : : : : : : : : : : : : : : : : : : : : \* \* \* \* \* : : : : :

ATP binding  
 2Atp7a\* MTEHERGCTAVLVAVDNELCAMVAIVTKPEAELAVHVLKAMGLEPVLVCGDNSTAR  
 2Atp7b\* MSSHETGQTALVAIDGVLCAMVAIVADTKAESALAVHVLSSMGEVYVMTGDNSTAR
 \* : : : \* : : \* : : \* : : \* : : \* : : \* : : \* : : \* : : \* : : \* : : \*

ATP binding  
 2Atp7a\* AIAAQVGRKVFVAVLPSHVAKVEVLQVLEKGRVAMVGDVNDPINALHADVGIAGTGIT  
 2Atp7b\* AIAVQVGRKVFVAVLPSHVAKVEQLQVLEKGRVAMVGDVNDPINALHADVGIAGTGIT
 \* : : : \* : : \* : : \* : : \* : : \* : : \* : : \* : : \* : : \* : : \* : : \*

Transmembrane  
 2Atp7a\* DVAIEAADVVLIRNDLLDVGSIDLSKKTVRRIRINVFVFLMYNLVGIPTAAGVFNPLVQ  
 2Atp7b\* DVAIEAADIVLIRNDLLDVASIELSKRTVQRIRINVFVFLIYNLGIPTAAGVFNPLVQ
 : \* : : : : \* : : : : : \* : : : : : \* : : : : : \* : : : : : \*

Transmembrane  
 2Atp7a\* VLQKNGSAAANLSSVSVLSLLEKCYKPTVEKLRRLGDVITHGSLSDVSVHIGMGE  
 2Atp7b\* VLQKNGSAAANLSSVSVLSLLEKLRKSTVSEVESRARRKLSLSPQVSTHVLG-E
 : : \* : : : : \* : : : : : \* : : : : : \* : : : : : \* : : : : : \*

GxxxG retention  
 2Atp7a\* LRRPSPKLSLDRFNVYSRASINSLRSHSMNSMLSEPPKHSLLVGDHDCNEIV  
 2Atp7b\* SRRKSP---LSDR---KRRSRASGSSSFSGSFYPTTOY-----NTSGRSIV
 \* \* \* \* \* \* \* \* : \* : : \* : : : \* : : : \* : : : \* : : : \* : : :
