# Supplementary figures and images for: Functional characterization of copper transporters zCtr1, zAtox1, zAtp7a and zAtp7b in zebrafish liver cell line ZFL
Source: Royal Society of Chemistry journal article supplement (doi:10.1039/c9mt00159j), 2019-08-13

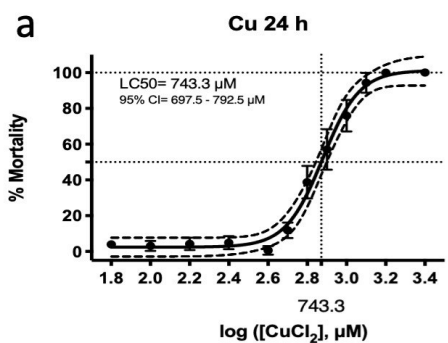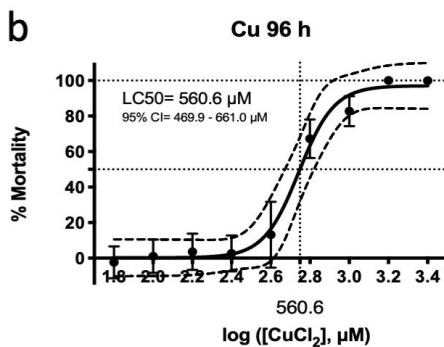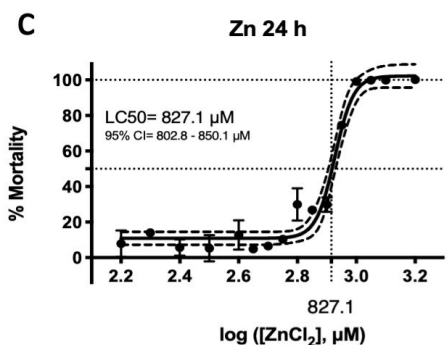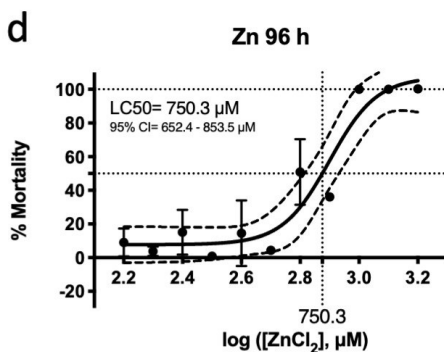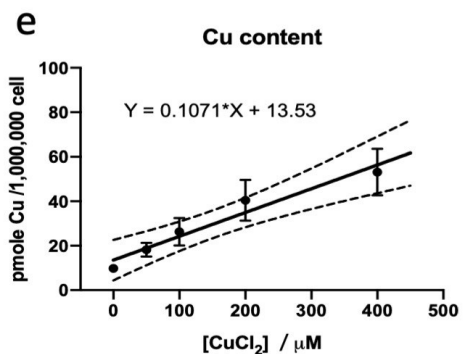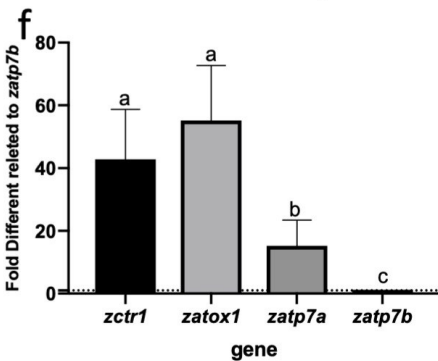

Supplement: c9mt00159j2.pdf [file c9mt00159j2.pdf]
